# Supplementary material for: Structural comparison of metabolic networks in selected single cell organisms
Source: Springer Nature journal article supplement (doi:10.1186/1471-2105-6-8), 2005-01-14
Supplement: Additional file 1 [file 1471-2105-6-8-s1.doc]

| Species | **Nreal: Nrand SD** | **Nreal: Nrand  SD** | **Nreal: Nrand  SD** |
| --- | --- | --- | --- |
| S.cerevisiae | 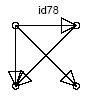 | 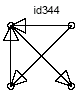 | 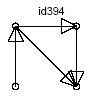 |
| 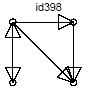 | 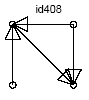 | 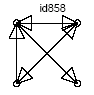 |
| 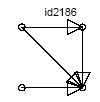 | 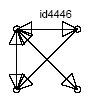 | 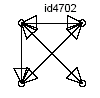 |
| 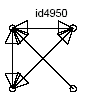 | 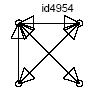 | 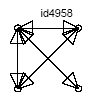 |
| E.coli | 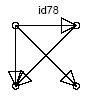 | 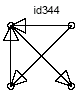 | 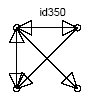 |
| 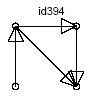 | 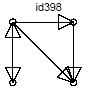 | 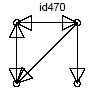 |
| 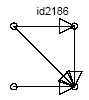 | 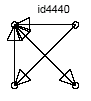 | 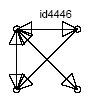 |
| 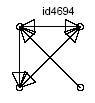 | 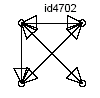 | 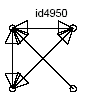 |
| 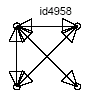 | 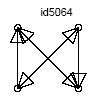 | 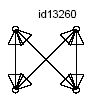 |
| *V.cholerae* | 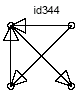 | 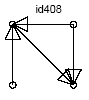 | 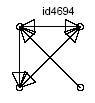 |
| 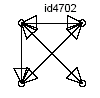 | 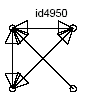 | 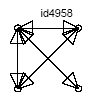 |
| 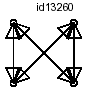 |  |  |
| *R.solanacearum* | 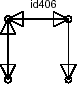 | 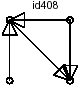 | 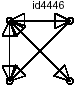 |
| 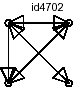 | 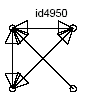 |  |
| *B.subtilis* | 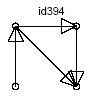 | 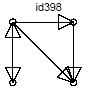 | 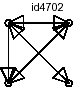 |
| 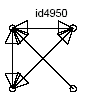 | 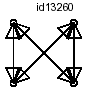 |  |
| *L.lactis* | 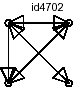 | 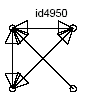 |  |
| S.solfataricus | 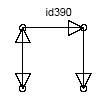 | 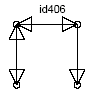 | 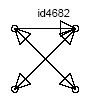 |
| S.tokodaii | 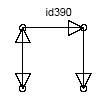 | 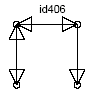 |  |
| M.acetivorans | 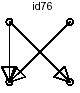 |  |  |
| *T.acidophilum* | None |  |  |
